# Supplementary material
Source: PubMed Central journal article supplement (PMC8177006)
Supplement: NIHMS1698503-supplement-Supple_fig_S1.pdf [file NIHMS1698503-supplement-Supple_fig_S1.pdf]

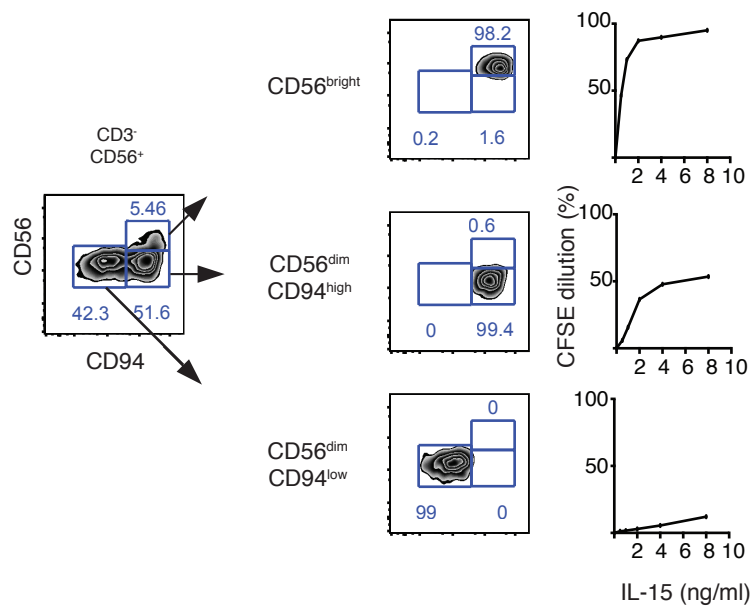

Supplementary Fig. S1. Differentiation from CD56<sup>bright</sup> to CD56<sup>dim</sup>/CD94<sup>high</sup> to CD56<sup>dim</sup>/CD94<sup>low</sup> NK cells is accompanied by increasing requirements for IL-15 to induce their proliferation. Various NK cell subsets were sorted from PBMCs of normal donors, CFSE-labeled, cultured for 7 days, and their CFSE dilution as a measure of proliferation was determined by FACS.
