# Supplementary material
Source: PubMed Central journal article supplement (PMC8177006)
Supplement: NIHMS1698503-supplement-Supple_table_1.pdf [file NIHMS1698503-supplement-Supple_table_1.pdf]

| Name   | clone          | company        | Name         | clone       | company           |
|--------|----------------|----------------|--------------|-------------|-------------------|
| CD2    | RPA-2.10       | BD biosciences | NKp30        | P30-15      | Biolegend         |
| CD3    | SP34-2         | BD biosciences | NKp44        | P44-8       | Biolegend         |
| CD11a  | HI111          | Biolegend      | NKp46        | 9E2         | Biolegend         |
| CD11b  | ICRF44         | Biolegend      | NKG2A        | #131411     | R&D Systems       |
| CD16   | 3G8            | Biolegend      | NKG2C        | #134591     | R&D Systems       |
| CD18   | CBR LFA-1/2    | Biolegend      | NKG2D        | 1D11        | Biolegend         |
| CD20   | Rituximab      |                | 2B4/CD244    | C1.7        | Biolegend         |
| CD25   | M-A251         | Biolegend      | DNAM-1/CD226 | 11A8        | Biolegend<br>BD   |
| CD27   | M-T271         | Biolegend      | IL-12Rb1     | 2.4E6       | biosciences<br>BD |
| CD29   | TS2/16         | Biolegend      | IL-12Rb2     | 2B6/12beta2 | biosciences       |
| CD49d  | 9F10           | Biolegend      | IL-18Ra      | #70625      | R&D Systems       |
| CD56   | HCD56          | Biolegend      | perforin     | dG9         | Biolegend         |
| CD57   | HCD57          | Biolegend      | Granzyme A   | CB9         | Biolegend         |
| CD62L  | Dreg 56        | Biolegend      | Granzyme B   | GB11        | Biolegend<br>BD   |
| CD69   | FN50           | Biolegend      | IL-10        | JES3-19F1   | biosciences       |
| CD85J  | #292305        | R&D Systems    | IL-6         | M92-13A5    | Biolegend         |
| CD94   | DX22           | Biolegend      | IFN $\gamma$ | 4S.B3       | Biolegend         |
| CD122  | Mik- $\beta$ 3 | BD biosciences | TNF $\alpha$ | Mab11       | Biolegend         |
| CD137  | 4B4-1          | Biolegend      | GM-CSF       | BVD2-21C11  | Biolegend         |
| CD158a | #143211        | R&D Systems    | CCR5         | NP-6G4      | eBioscience       |
| CD158b | DX27           | Biolegend      | CCR7         | G043H7      | Biolegend         |
| Trail  | Rik-2          | Biolegend      | CX3CR1       | 2A9-1       | Biolegend         |
| Ki67   | Ki-67          | Biolegend      | CXCR5        | J252D4      | Biolegend         |
| CXCR1  | 8F1/CXCR1      | Biolegend      | CXCR4        | VII 70204   | Biolegend         |
| CXCR3  | G025H7         | Biolegend      |              |             |                   |

Supplementary Table 1: antibodies sources
