# Supplementary material
Source: PubMed Central journal article supplement (PMC8177006)
Supplement: NIHMS1698503-supplement-Supply_fig_S2.pdf [file NIHMS1698503-supplement-Supply_fig_S2.pdf]

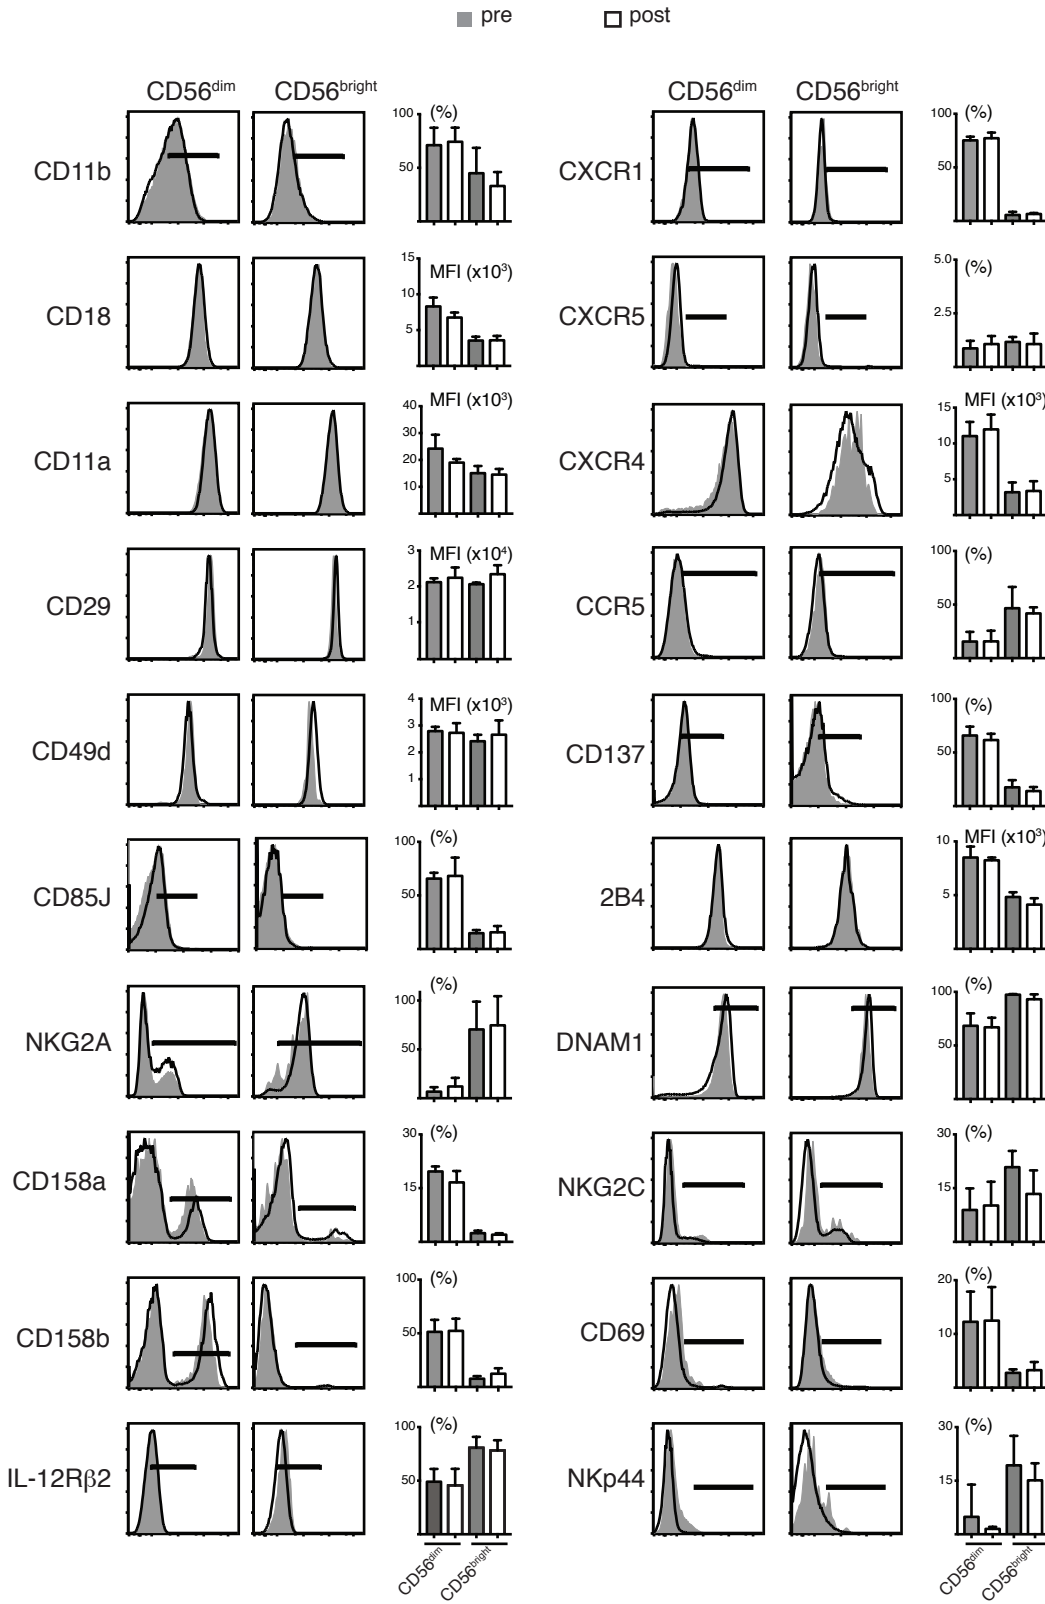

Supplementary Fig. S2. Representation of surface marker analyses on gated NK cells with constant expressions before and after IL-15 infusions.
